# Supplementary material
Source: PubMed Central journal article supplement (PMC7066988)
Supplement: NIHMS1563843-supplement-Supplementary_information.pdf [file NIHMS1563843-supplement-Supplementary_information.pdf]

## Supporting Information

# Pro-nifuroxazide Self-Assembly Leads to Triggerable Nanomedicine for Anti-Cancer Therapy

Santosh K. Misra,<sup>1,3†‡</sup> Zhe Wu,<sup>5†</sup> Fatemeh Ostadhossein,<sup>1,3</sup> Mao Ye,<sup>1,3</sup> Kingsley Boateng,<sup>8</sup>  
Klaus Schulten,<sup>2,5</sup> Emad Tajkhorshid,<sup>2,6</sup> and Dipanjan Pan<sup>1,2,3,4,7\*</sup>

<sup>1</sup>Department of Bioengineering, University of Illinois at Urbana-Champaign, USA, 61801

<sup>2</sup>Beckman Institute of Advanced Science and Technology, University of Illinois at Urbana-Champaign, Illinois, USA, 61801

<sup>3</sup>Mills Breast Cancer Institute, Carle Foundation Hospital, 502 N. Busey, Urbana, Illinois, USA, 61801

<sup>4</sup>Department of Materials Science and Engineering, University of Illinois-Urbana Champaign, Illinois, USA, 61801

<sup>5</sup>Center for the Physics of Living Cells, Department of Physics, University of Illinois-Urbana Champaign, Illinois, USA, 61801

<sup>6</sup>Department of Biochemistry, University of Illinois-Urbana Champaign, Illinois, USA, 61801

<sup>7</sup>Department of Materials Science and Engineering, University of Illinois-Urbana Champaign, Illinois, USA, 61801

<sup>8</sup>Carl R. Woese Institute for Genomic Biology, University of Illinois-Urbana Champaign, Illinois, USA, 61801

†Authors contributed equally to this work.

\*Corresponding Author: [dipanjan@illinois.edu](mailto:dipanjan@illinois.edu)

| <b>Content</b>                                                                                | <b>Page</b> |
|-----------------------------------------------------------------------------------------------|-------------|
| Fig. S1. Mapping atomistic structure to a coarse-grained model of pro-nifuroxazide            | S-3         |
| Table S1. Coarse-grained model parameters for pro-nifuroxazide                                | S-4         |
| Fig. S2. Stages of self-assembly DPD simulations                                              | S-5         |
| Fig. S3. Prodrug nanoparticle structures resulted from independent DPD simulations            | S-6         |
| Fig. S4. Chemical characterization of pro-nifuroxazide synthesized from nifuroxazide          | S-7         |
| Fig. S5. Characterizations of drug and nano-prodrug                                           | S-8         |
| Fig. S6 Stability of different formulations in various mediums                                | S-9         |
| Fig. S7 Release kinetics of nifuroxazide from different nanoparticles                         | S-10        |
| Fig. S8 Protein interaction properties of different nanoparticles                             | S-11        |
| Fig. S9 Protein interaction efficiency by protein assay                                       | S-12        |
| Fig. S10. <i>In vitro</i> analysis of cancer cell growth regression as effect of prodrug      | S-13        |
| Fig. S11. <i>In vitro</i> analysis of cancer cell growth regression as effect of nano-prodrug | S-14        |
| Fig. S12. Representative histogram of PI stained MCF-7 cells                                  | S-15        |
| Fig. S13. MTT assay performed on MCF-7 and MDA-MB231 using control nanoparticles              | S-16        |
| Fig. S14. Representative H&E sections of tumors treated with buffer                           | S-17        |
| Fig. S15. Representative H&E sections of tumors treated with nano-prodrug                     | S-18        |
| Fig. S16. Representative immune-labelled cross sections of tumors treated with buffer         | S-19        |
| Fig. S17. Representative immune-labelled sections of tumors treated with nano-prodrug         | S-20        |
| Parameters and system setup in calculation of membrane-prodrug interaction                    | S-21        |

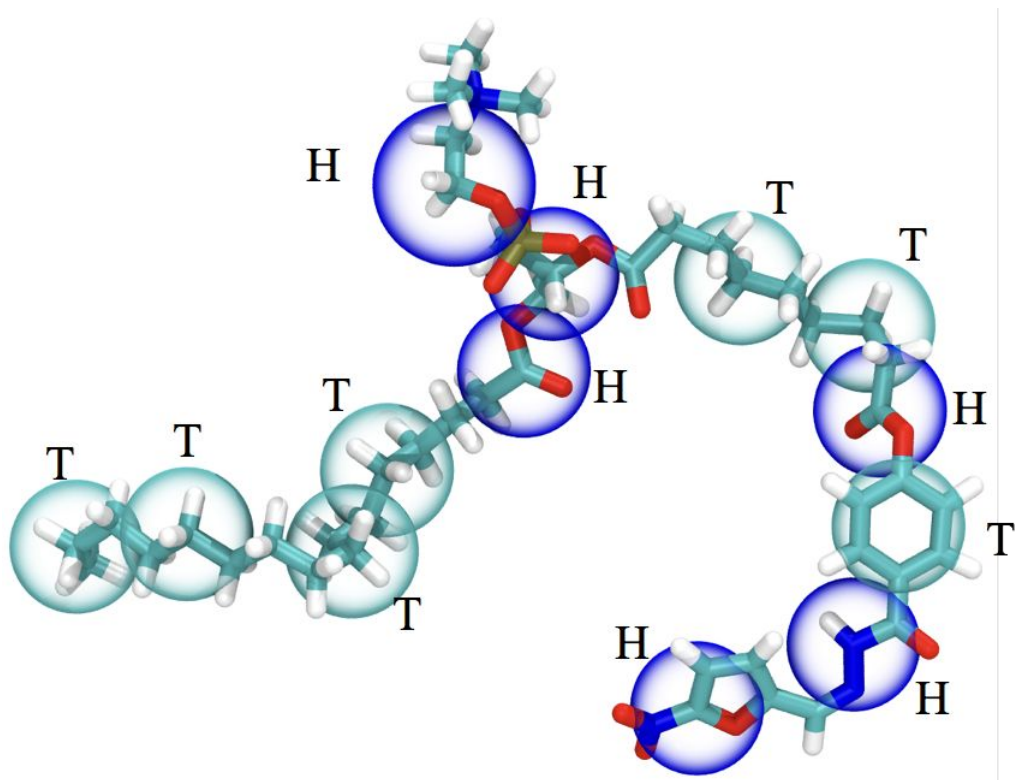

**Figure S1.** Mapping from atomistic structure to a coarse-grained DPD model of pro-nifuroxazide. Coarse-grained particle types are labeled by letters.

**Table S1.** Coarse-grained model parameters for pro-nifuroxazide and polyethylene glycol cetyl ether

Non-bond interaction force parameter  $a_{ij}$  (unit:  $k_B T/r_0$ )

|          | <b>H</b> | <b>T</b> | <b>W</b> |
|----------|----------|----------|----------|
| <b>H</b> | 25       | 50       | 35       |
| <b>T</b> | 50       | 25       | 75       |
| <b>W</b> | 35       | 75       | 25       |

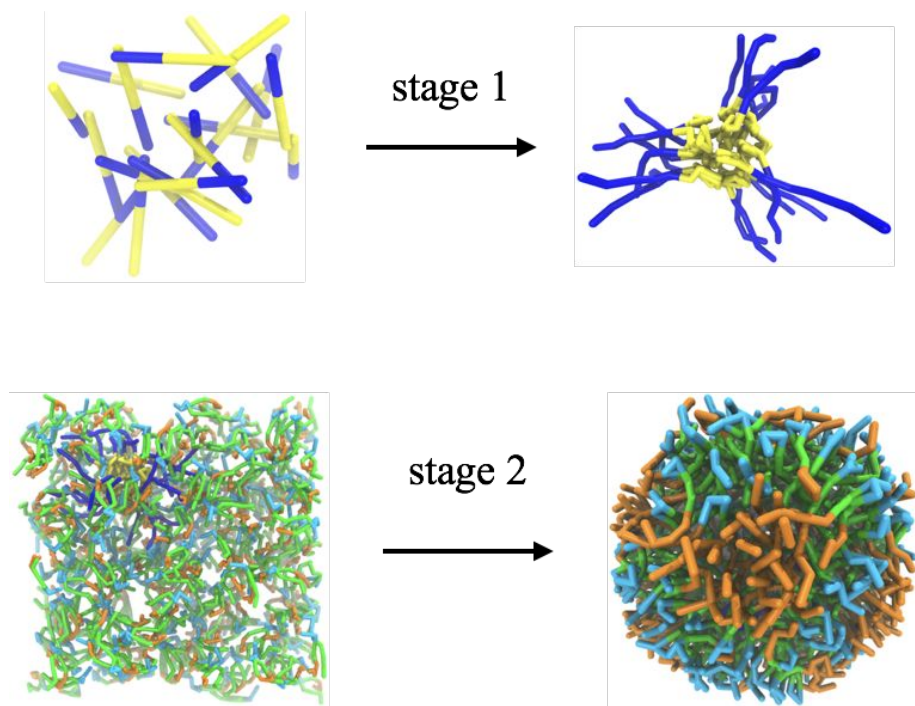

**Figure S2.** Two stages of self-assembly DPD simulations: (1) formation of a core particle with PEGCE, and, (2) formation of prodrug nanoparticle.

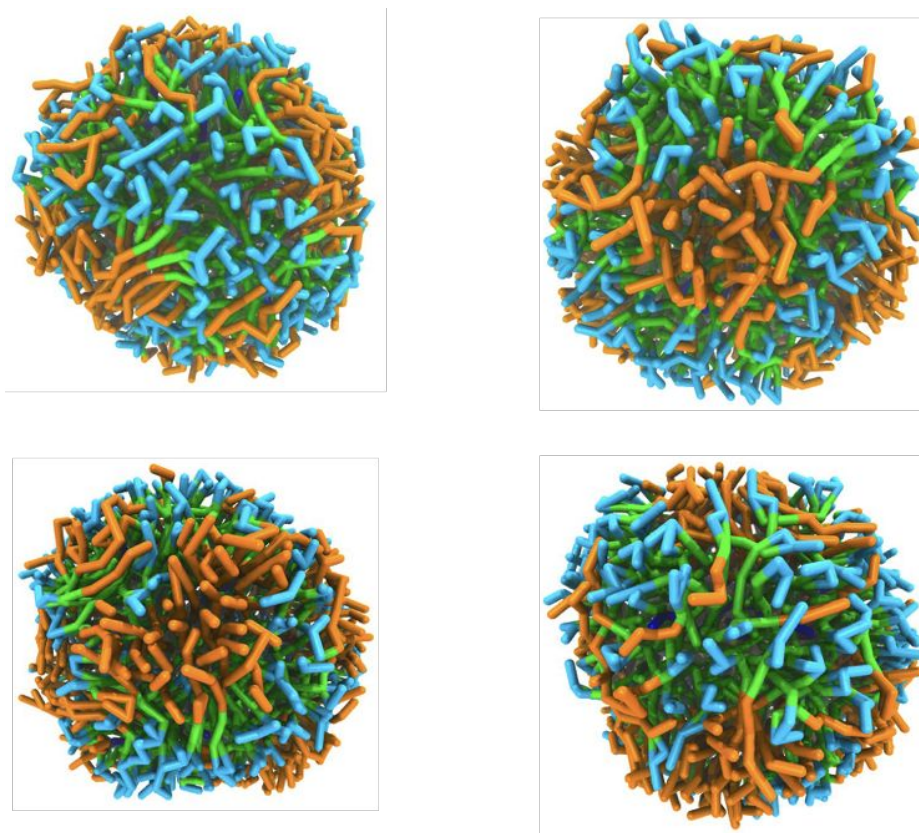

**Figure S3.** Examples of prodrug nanoparticle structures resulted from independent DPD simulations.

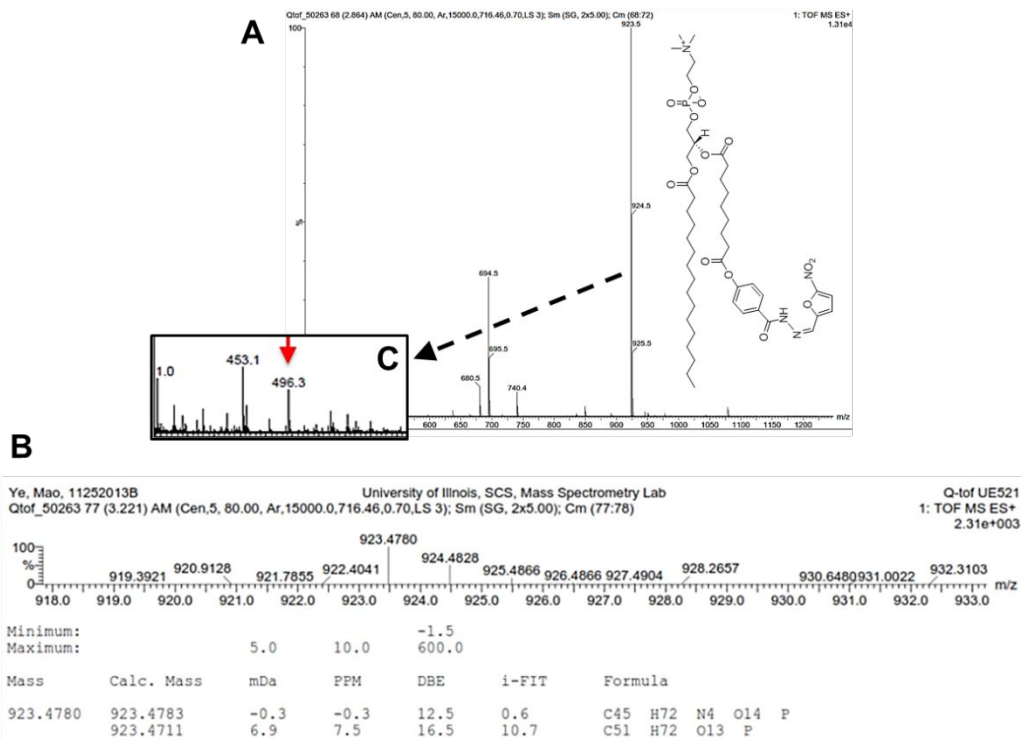

**Figure S4.** Chemical characterization of pro-nifuroxazide synthesized from nifuroxazide small molecule. LRMS (A) and HRMS (B) analyses after incubation with phosphate buffer at pH 4.5 and after treatment with phospholipase 2 (PLA2) m/z: 496.34 (MH<sup>+</sup> for nifuroxazide calculated for C<sub>24</sub>H<sub>51</sub>NO<sub>7</sub>P), calculated 496.64 MH<sup>+</sup> for liberated lysoPC (C).

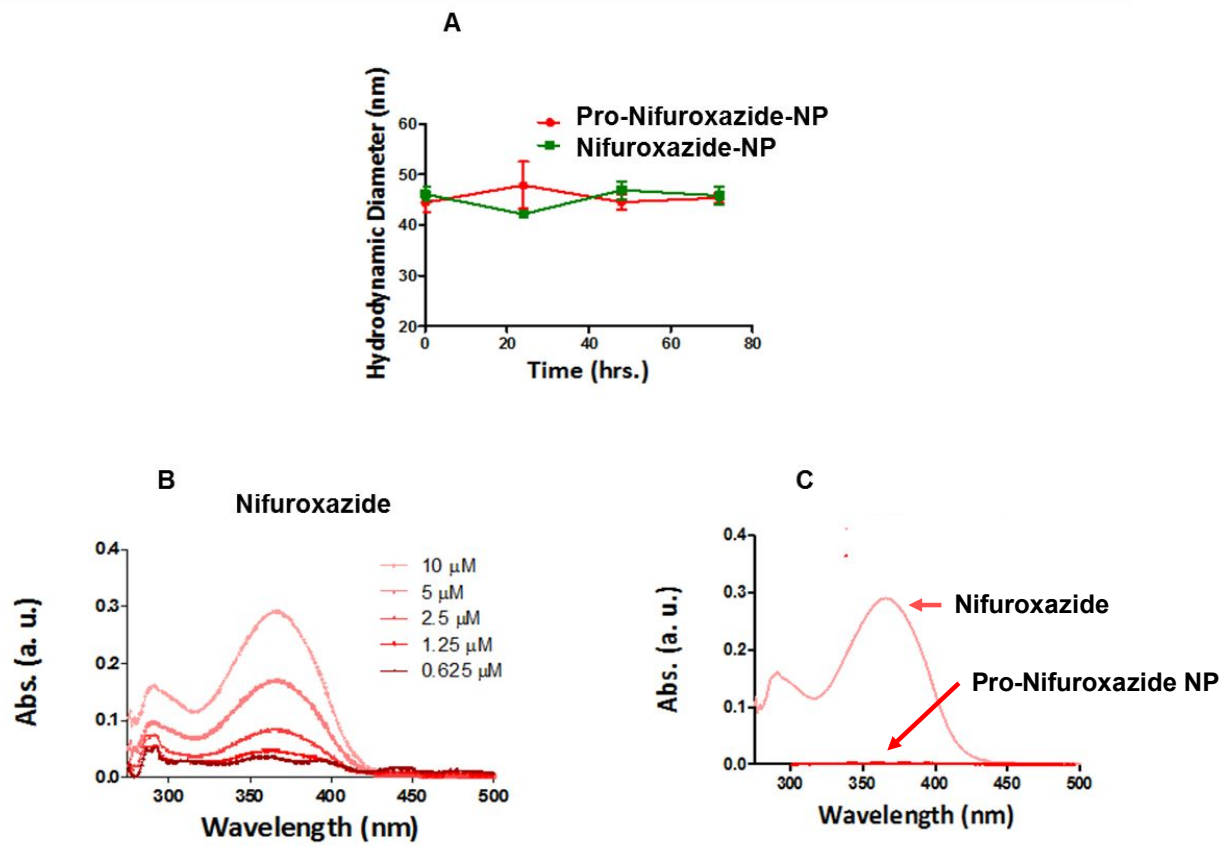

**Figure S5.** Characterizations of drug and nano-prodrug. (A) stability of nano-prodrug; (B) UV-vis spectroscopic pattern varied with change in different concentration of nifuroxazide (10 to 0.625  $\mu$ M) and (C) decrease in absorbance of nifuroxazide with formation of Pro-nifuroxazide NP.



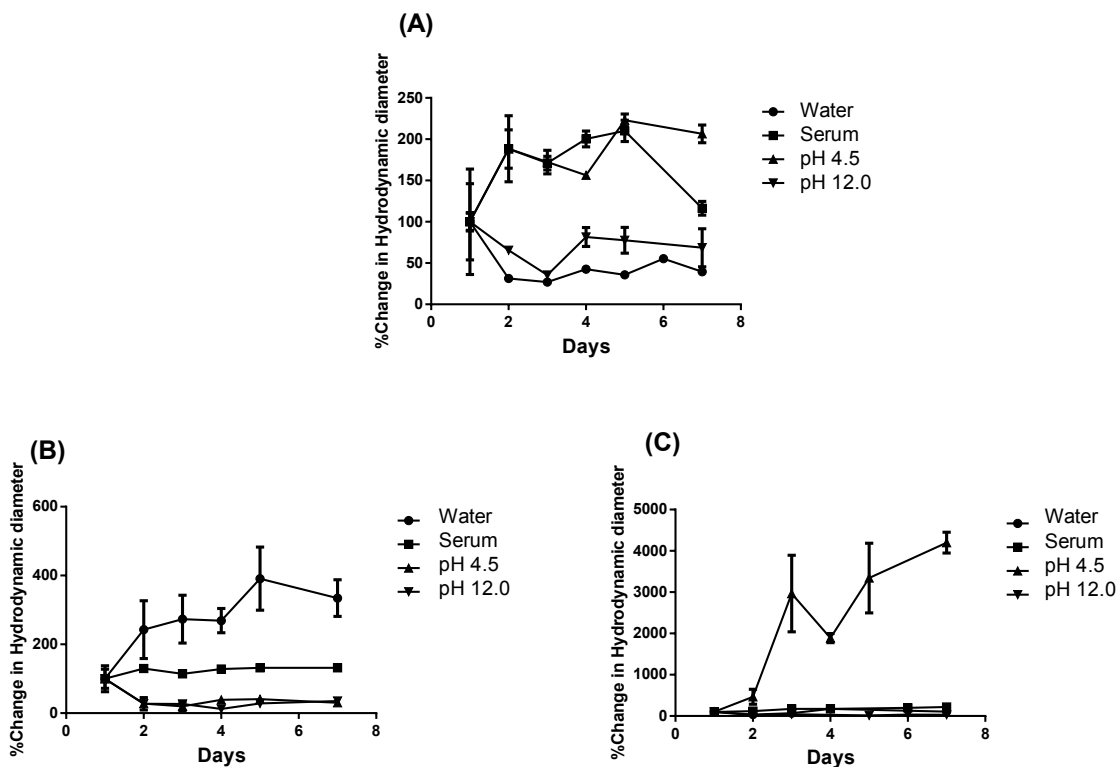

**Figure S6.** Stability of different formulations in various mediums. Hydrodynamic diameter of formulations (A) Lipid-NPs, (B) Pro-Nifuroxazide NP (no-core) and (C) Pro-nifuroxazide NP were acquired at 1, 2, 3, 4, 5, 6 and 7 days after incubation with water, Serum, pH 4.5 and pH 12.0 at 37 °C.

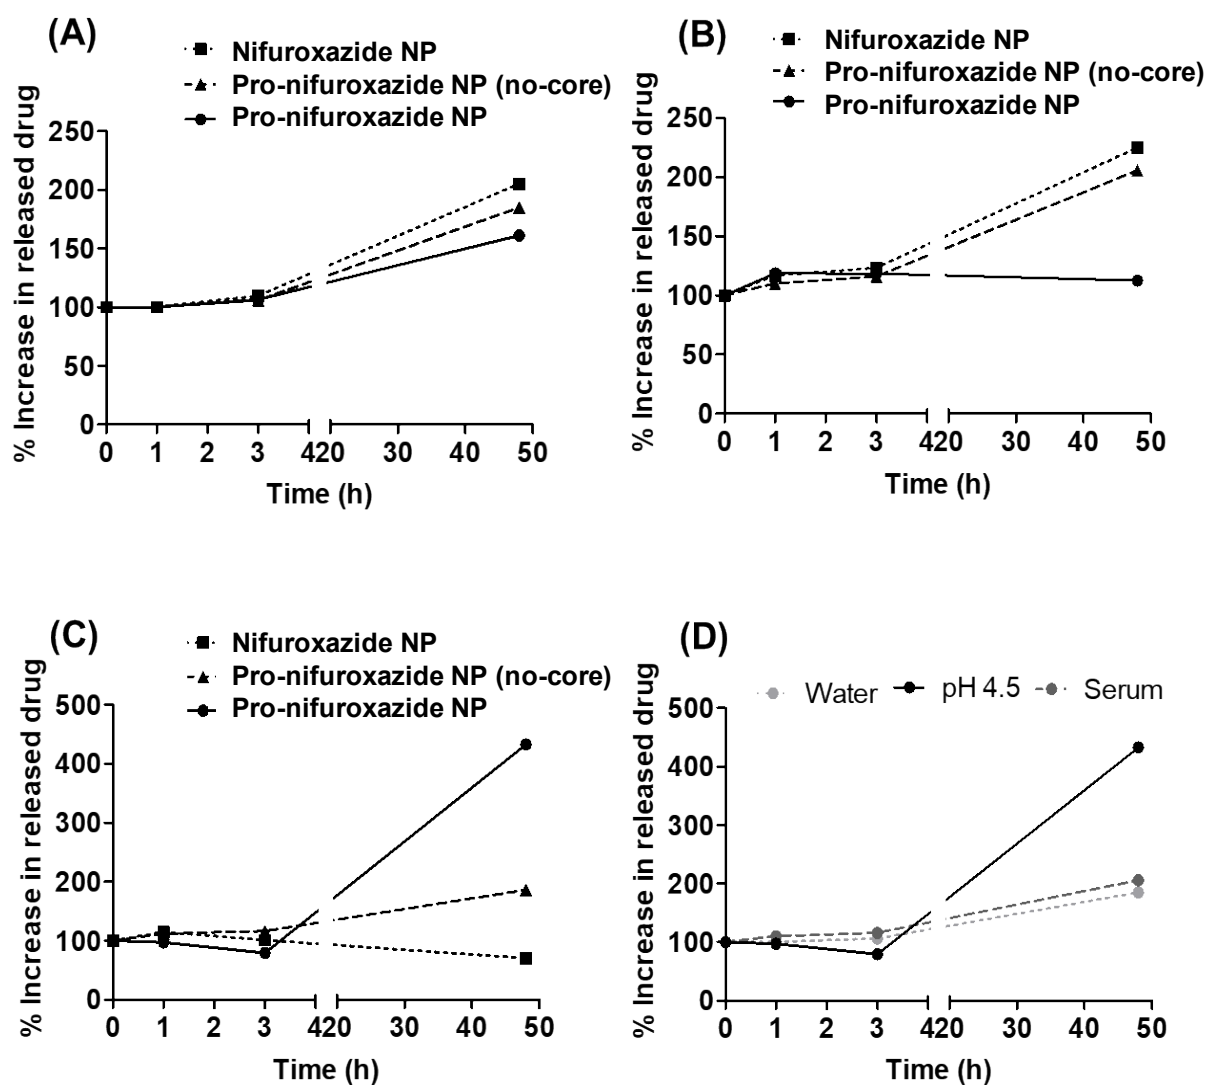

**Figure S7.** Release kinetics of nifuroxazide from different nanoparticles incubated with different suspension mediums including (A) water; (B) blood serum (10%) and (C) pH 4.5. (D) Comparison of nifuroxazide release from Pro-nifuroxazide NPs in different mediums after 48h of incubation. Suspensions were incubated at 37 °C for 1, 3 and 48h.

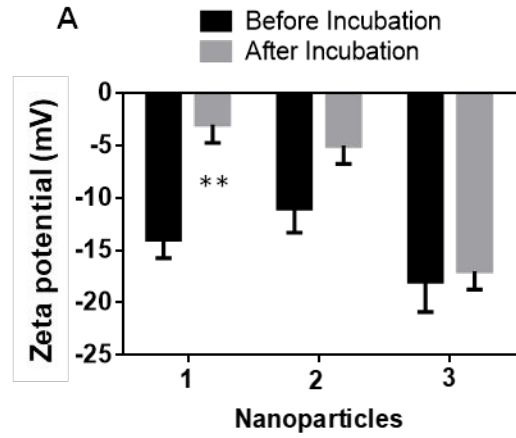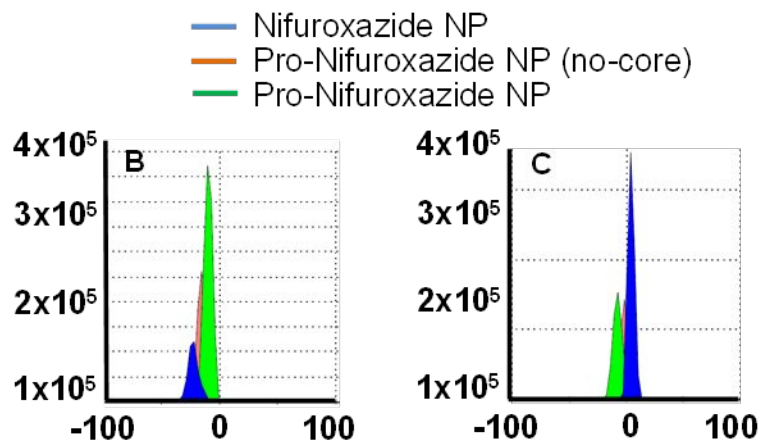

**Figure S8.** (A) Protein interaction properties of different nanoparticles presented as (1) Nifuroxazide NP, Pro-Nifuroxazide NP (no-core) and (3) Pro-Nifuroxazide NPs. Formulations were incubated with 10% FBS for 4h at 37 °C before performing the zeta potential experiments. Changes in electrophoretic potential after incubation indicate formation of protein corona. Statistical analysis was performed using ONE Way ANOVA with post Bonferroni test. Here \*\* represents p values < 0.01. Zeta potential of Nifuroxazide NP (blue), Pro-Nifuroxazide NP (no-core) (orange) and Pro-Nifuroxazide NPs (green) (B) before and (C) after 7 days of incubation with 10% FBS.

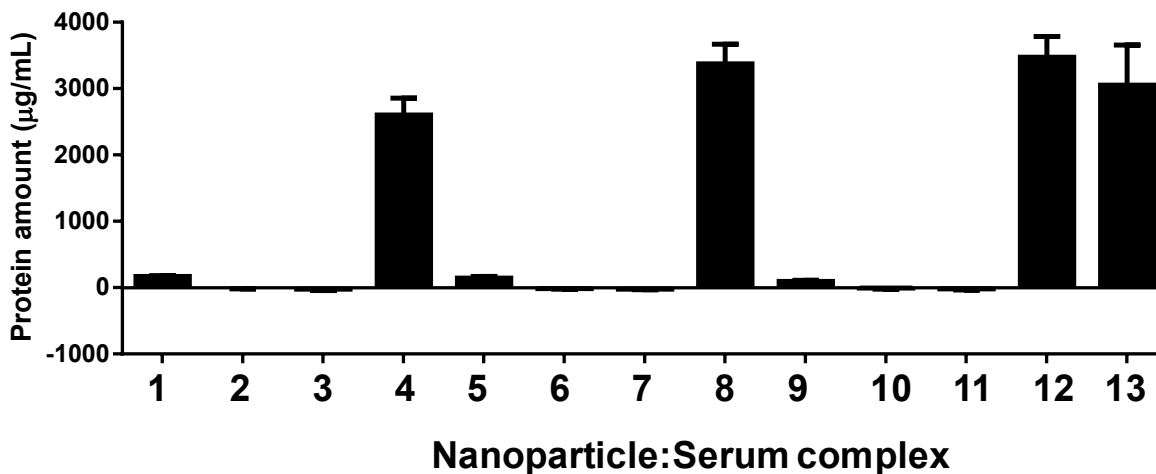

**Figure S9.** Protein interaction efficiency of Nifuroxazide NP, Pro-Nifuroxazide NP (no-core) and Pro-Nifuroxazide NPs after 4h incubation at 37 °C. A Bradford's assay was performed on nanoparticles coated with protein and remaining protein unbound. Here nanoparticle:serum complexes are represented as **1**: Nifuroxazide NP coated with 25% serum protein; **2**: Nifuroxazide NP coated with 5% serum protein; **3**: Nifuroxazide NP coated with 1% serum protein; **4**: Total amount of serum protein added to Nifuroxazide NPs; **5**: Pro-Nifuroxazide NP (no-core) coated with 25% serum protein; **6**: Pro-Nifuroxazide NP (no-core) coated with 5% serum protein; **7**: Pro-Nifuroxazide NP (no-core) coated with 1% serum protein; **8**: Total amount of serum protein added to Pro-Nifuroxazide NPs (no-core); **9**: Pro-Nifuroxazide NP coated with 25% serum protein; **10**: Pro-Nifuroxazide NP coated with 5% serum protein; **11**: Pro-Nifuroxazide NP coated with 1% serum protein; **12**: Total amount of serum protein added to Pro-Nifuroxazide NPs and **13**: Total amount of protein in used volume of FBS.

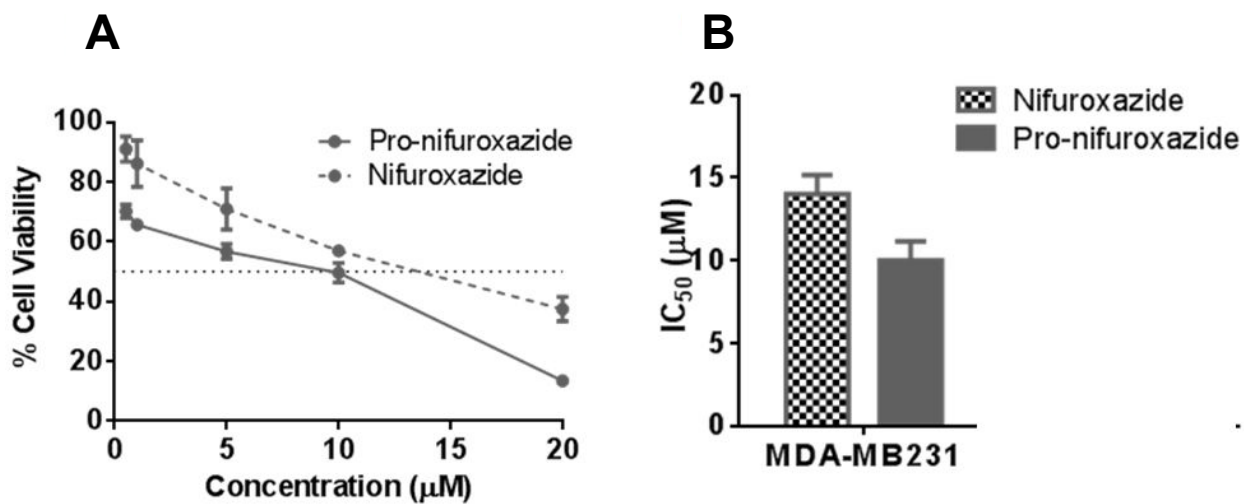

**Figure S10.** *In vitro* analysis of cancer cell growth regression after treatment with nifuroxazide and pro-nifuroxazide. (A) MTT assay performed on MDA-MB231 cells after 72h treatment of nifuroxazide and pro-nifuroxazide at concentration ranging from 0.5 to 20 µM and (B) IC<sub>50</sub> values of nifuroxazide and prodrug in MDA-MB231 cells.

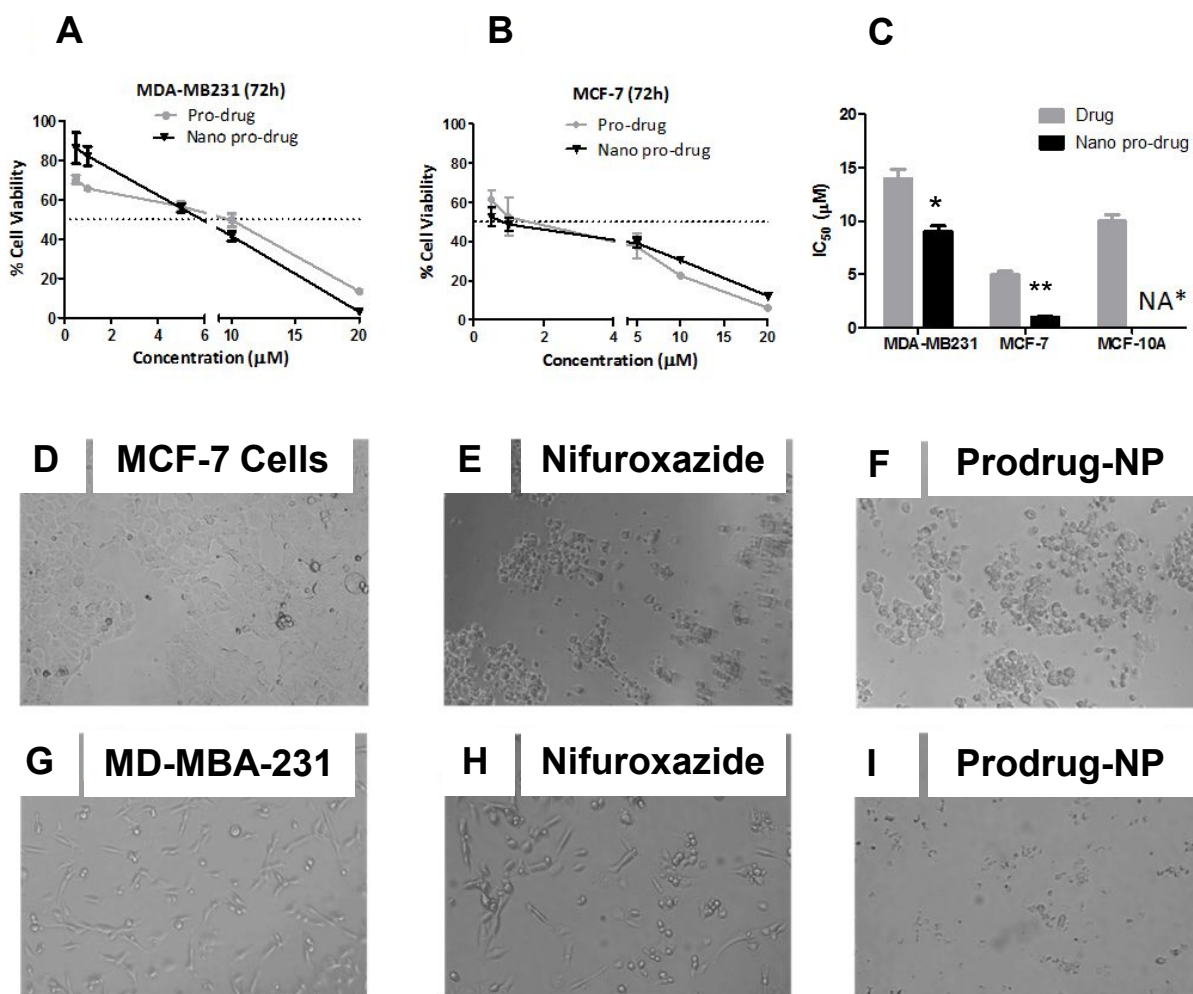

**Figure S11.** *In vitro* analysis of cancer cell growth regression after treatment with nifuroxazide and nano-prodrug. MTT assay performed on (A) MDA-MB231 and (B) MCF-7 cells after 72h treatment of nifuroxazide and pro-nifuroxazide-NP at concentration ranging from 0.5 to 20  $\mu\text{M}$  and (C)  $\text{IC}_{50}$  summarized for all the cell lines. Bright field images of MCF-7 cells (D) untreated and treated with (E) nifuroxazide; (F) pro-nifuroxazide and MDA-MB231 cells (G) untreated and treated with (H) nifuroxazide; (I) pro-nifuroxazide-NP treated at concentration of 20  $\mu\text{M}$ . Biostatistical analysis was performed using ONE Way ANOVA with post Bonferroni test. Here \* and \*\* represent p values <0.05 and 0.01, respectively.

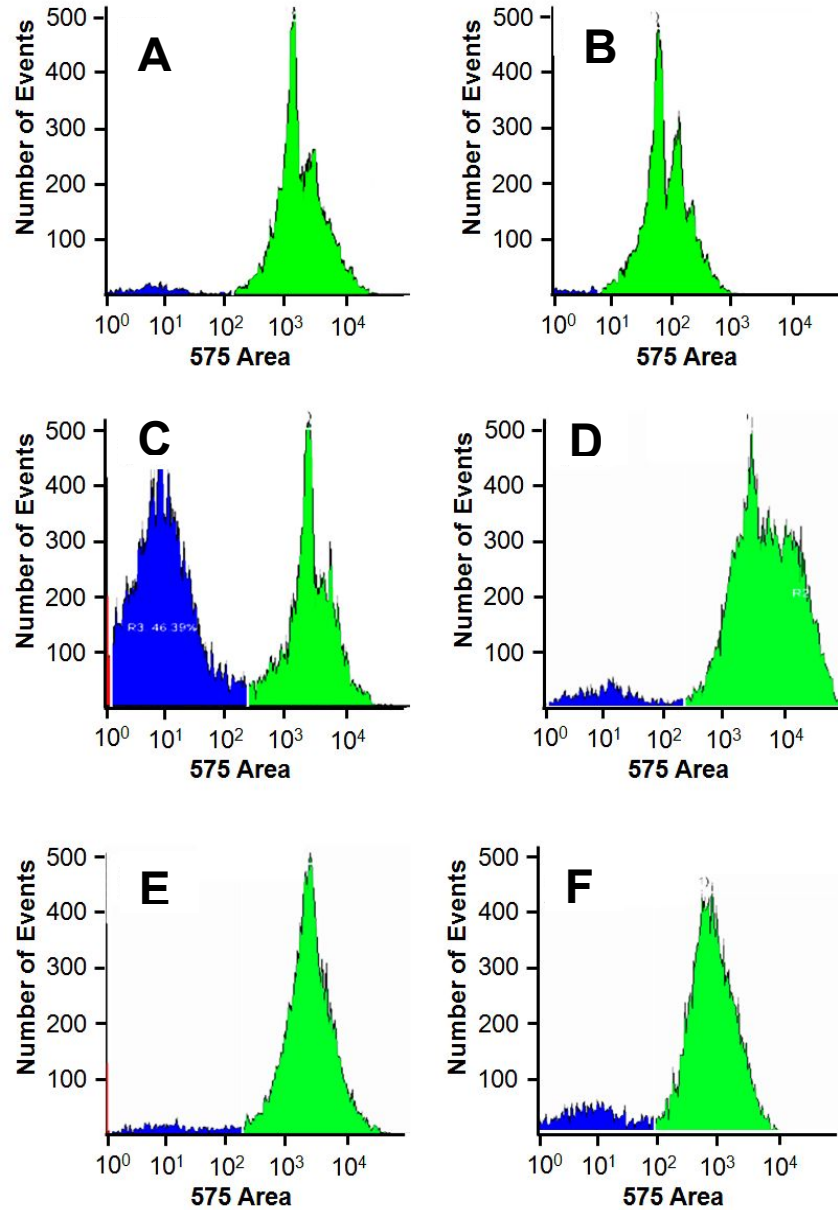

**Figure S12.** Representative histogram of PI stained MCF-7 cells treated with (A) untreated and treated with (B) nifuroxazide and (C) pro-nifuroxazide-NP (nano-prodrug) and MDA-MB231 (D) untreated and treated with (E) nifuroxazide and (F) pro-nifuroxazide-NP (nano-prodrug).



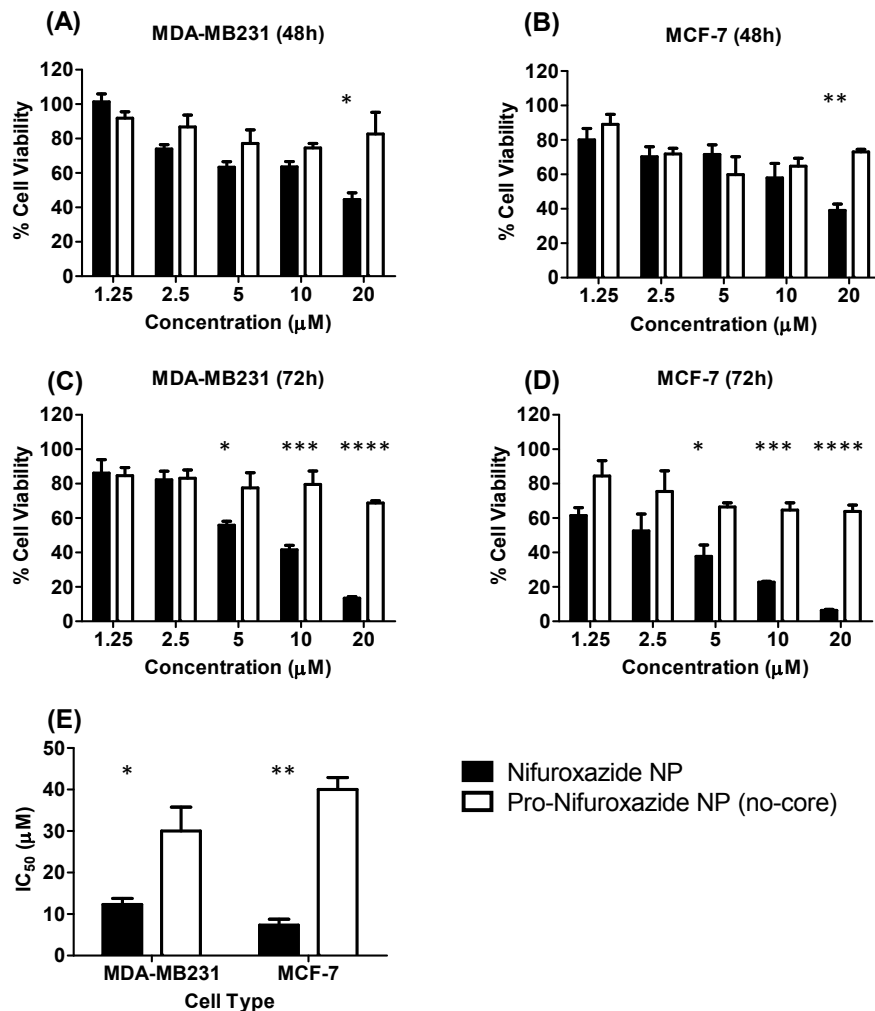

**Figure S13.** MTT assay performed on MCF-7 and MDA-MB231 using cored nanoparticles with loaded nifuroxazide (Nifuroxazide NP) and non-cored nanoparticles with Pro-nifuroxazide (Pro-nifuroxazide NP (no-core)). Experiments were performed in MDA-MB231 cells at (A) 48 and (C) 72h time points, MCF-7 cells at (B) 48 and (D) 72h time point and comparison for IC<sub>50</sub> values in MCF-7 and MDA-MB231 cells. Experiments were performed for two different time points and nifuroxazide concentration of 1.25, 2.5, 5, 10 and 20 µM. Biostatistical analysis was performed using ONE Way ANOVA with post Bonferroni test. Here \*, \*\*, \*\*\* and \*\*\*\* represent p values <0.05, 0.01, 0.001 and 0.0001, respectively.

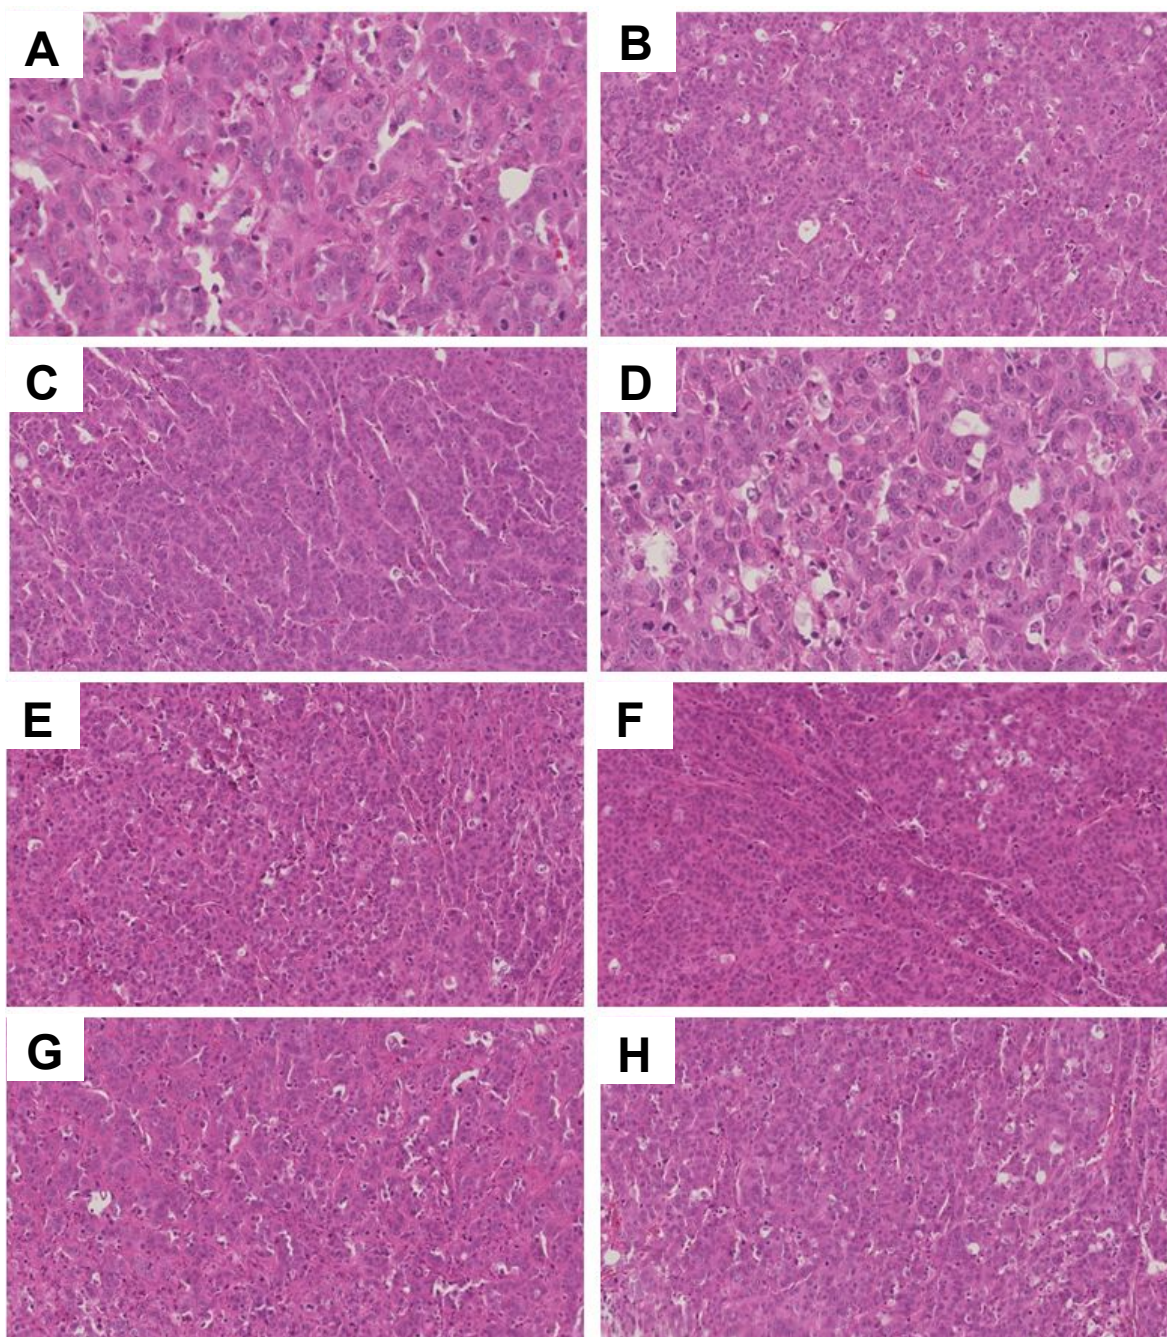

**Figure S14.** Representative H & E sections of tumors treated with buffer (A-H). Here sections are from same tumors on same or different animals including (A-D) from animal #2 and (E-H) from Animal #9 as each represent individual tumor. Sections were stained with histamine (red) and eosin (blue).

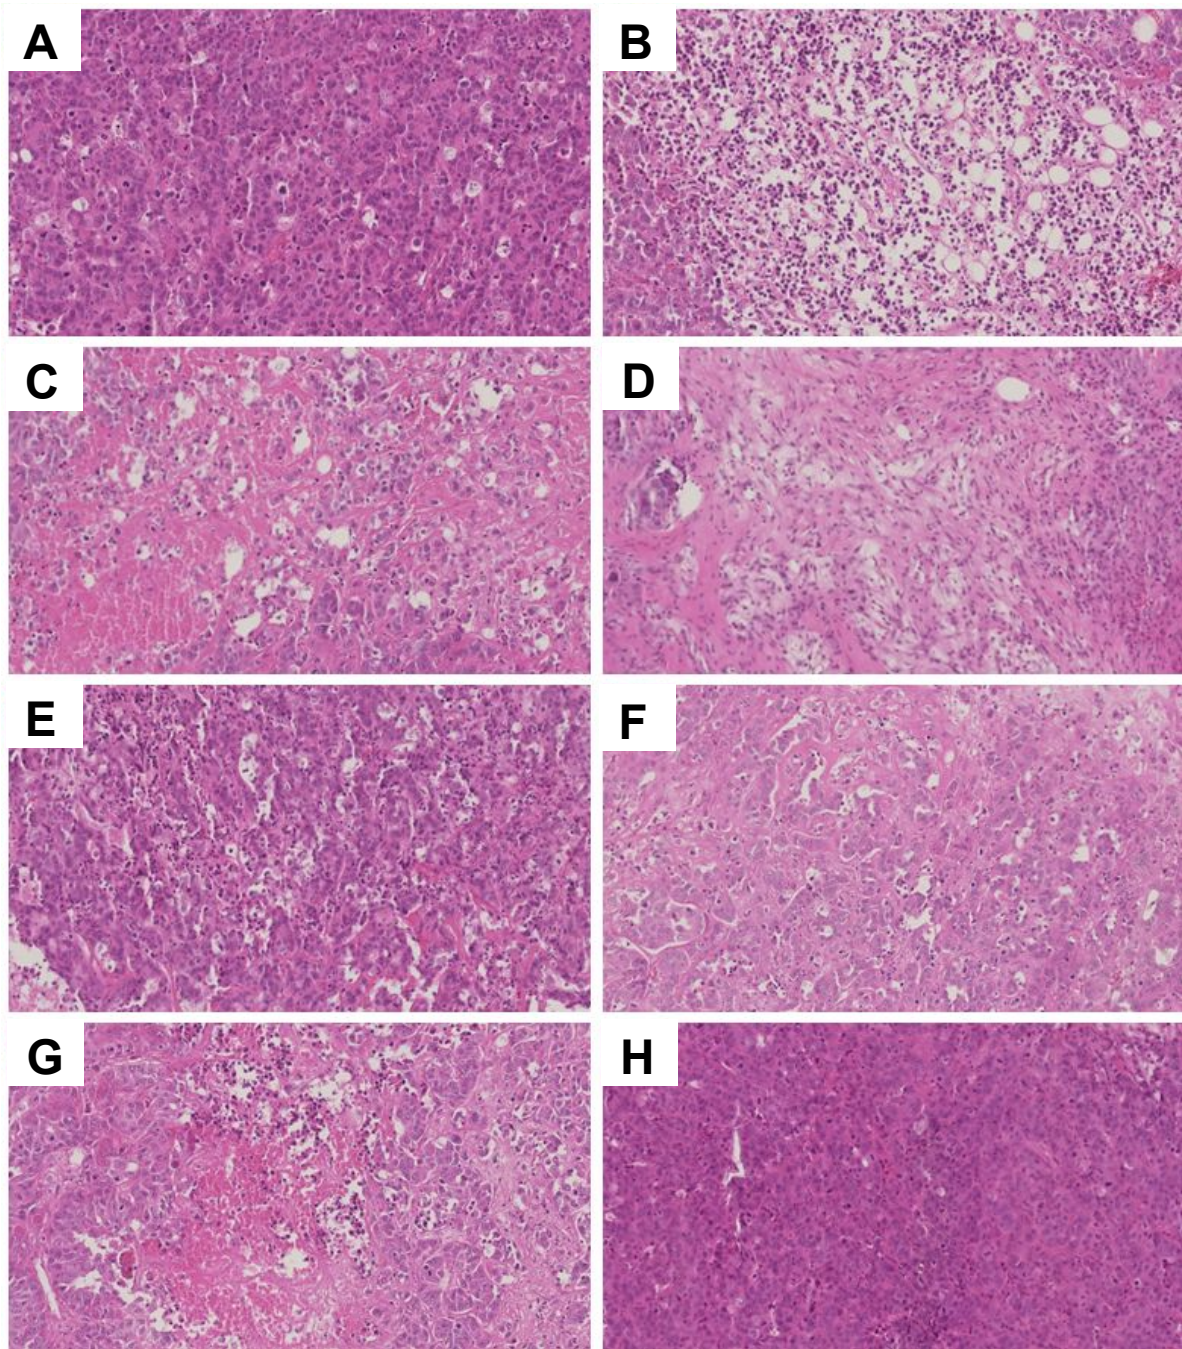

**Figure S15.** Representative H&E sections of tumors treated with nano-prodrug (A-H). Here sections are from same tumors on same or different animals including (A-D) from animal #1 and (E-H) from Animal #17 as each represent individual tumor. Sections were stained with histamine (red) and eosin (blue).

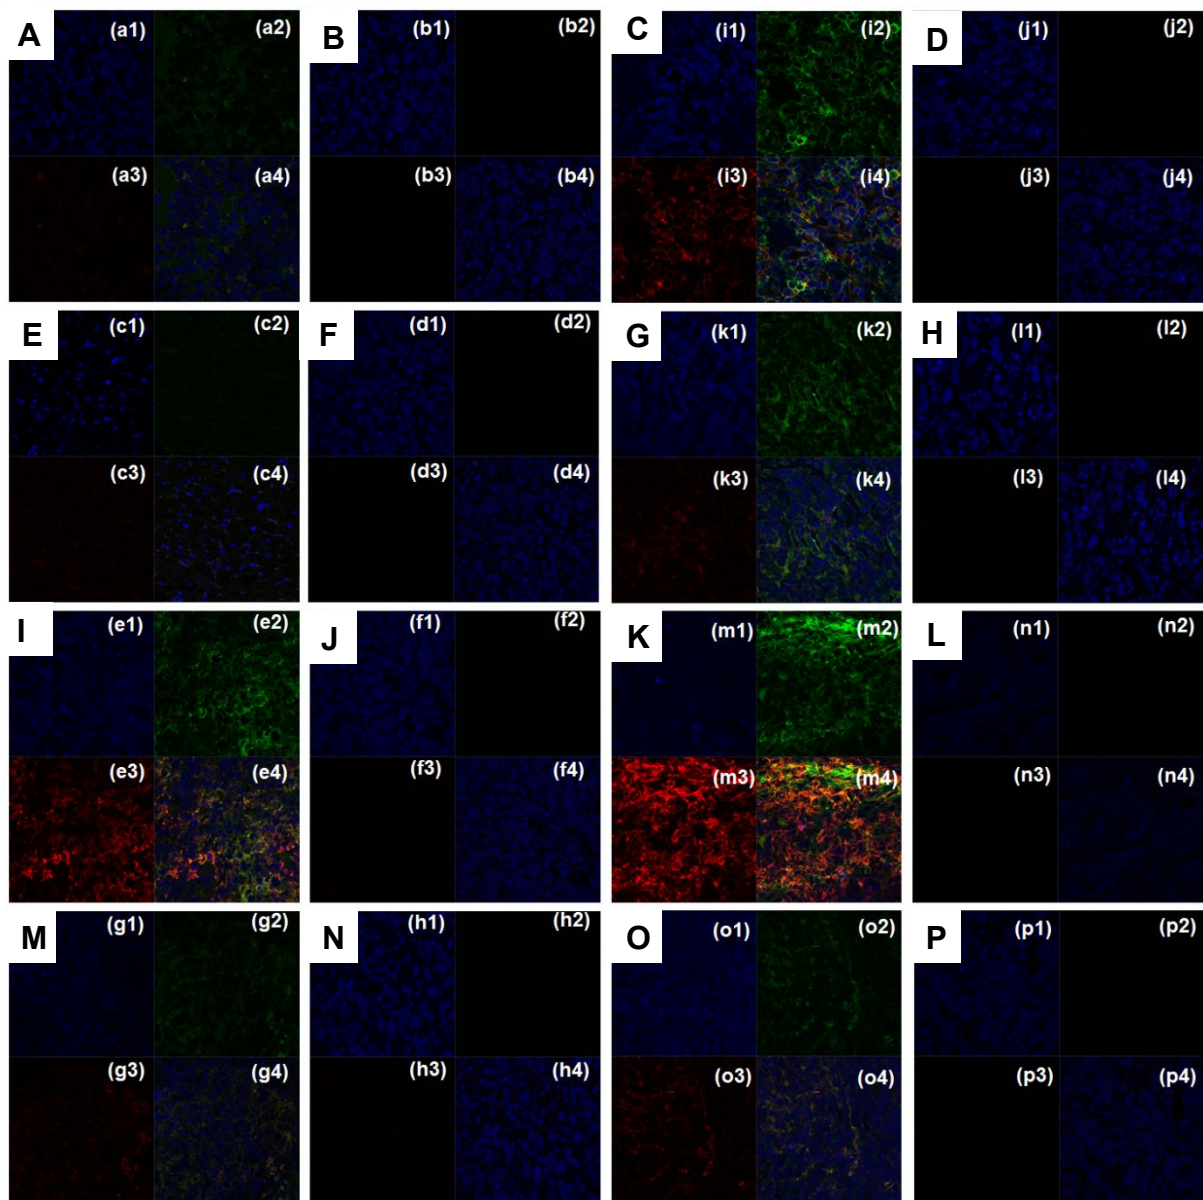

**Figure S16.** Representative immune-labelled cross sections of tumors treated with buffer (A-P). Here sections are from same tumors on same or different animals including (A and B); (C and D); (E and F); (G and H) from animal #1 and (I and J); (K and L); (M and N) and (O and P) from Animal #17. Sections were treated with or without pSTAT-3 antibody (red) against antibody treated against common unaffected protein  $\beta$ -actin (green). All the sections from tumors were also stained with DAPI (blue) to visualize cell nuclei. A low level of pSTAT-3 in tumors treated with pro- nifuroxazide NP were visualized across all the section.

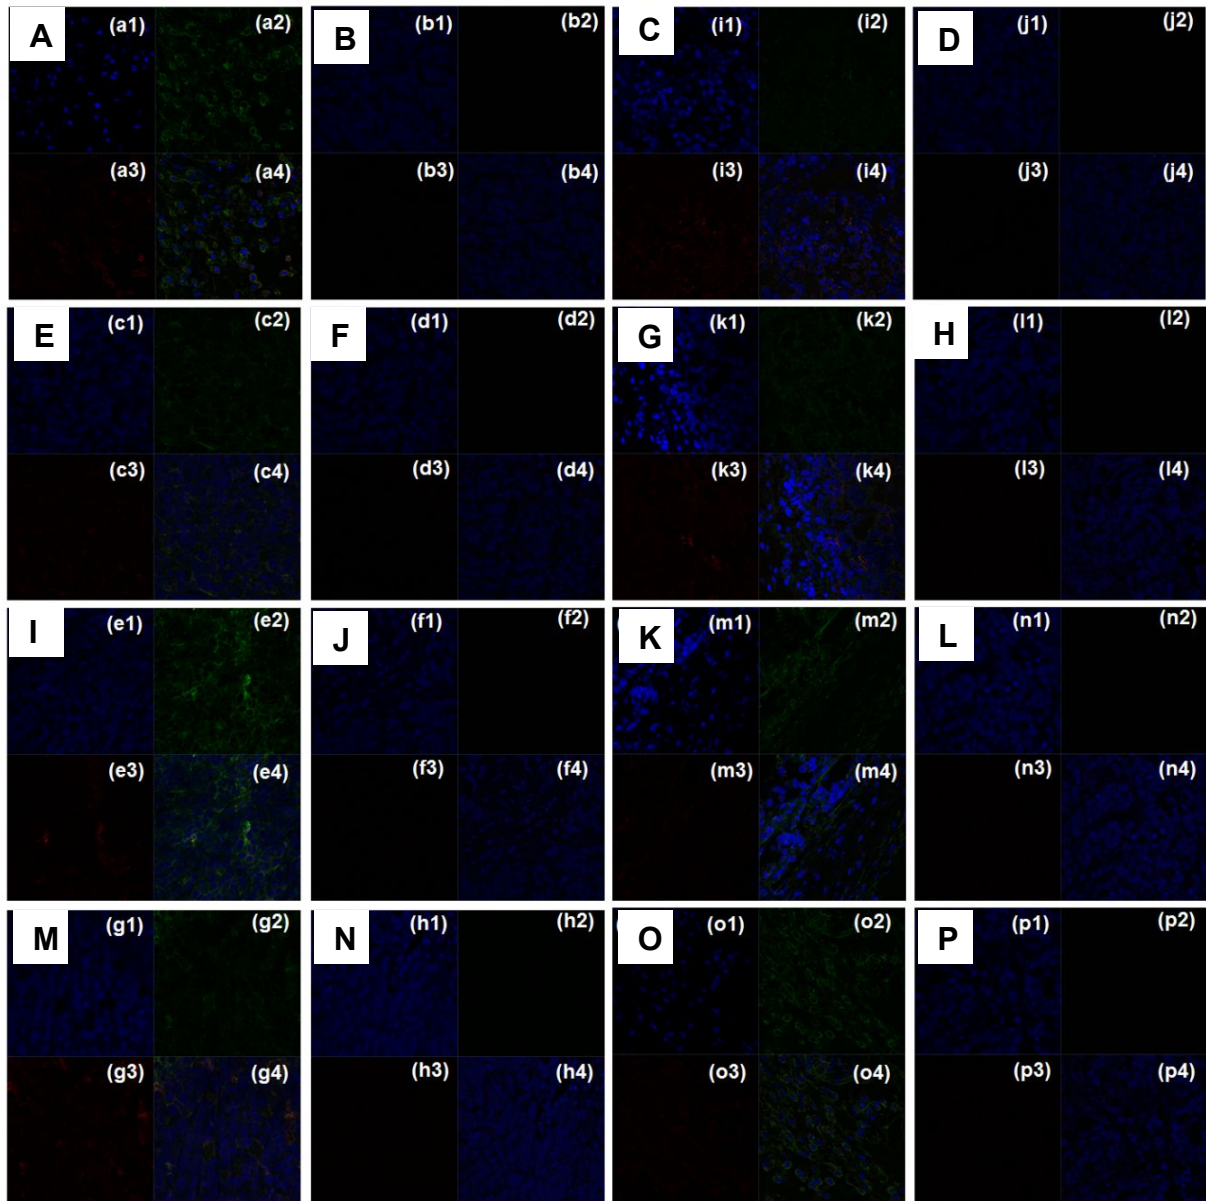

**Figure S17.** Representative immune-labelled cross sections of tumors treated with nano-prodrug (A-P). Here sections are from same tumors on same or different animals including (A and B); (C and D); (E and F); (G and H) from animal #1 and (I and J); (K and L); (M and N) and (O and P) from Animal #17. Sections were treated with or without pSTAT-3 antibody (red) against antibody treated against common unaffected protein  $\beta$ -actin (green). All the sections from tumors

were also stained with DAPI (blue) to visualize cell nuclei. A low level of pSTAT-3 in tumors treated with pro-nifuroxazide NP were visualized across all the sections.

### Atomistic CGenFF parameters for pro-nifuroxazide

#### Parameter file:

\* Parameters generated by analogy by

\* CHARMM General Force Field (CGenFF) program version 0.9.7.1 beta

\*

#### BONDS

CG2DC1 CG2R51 365.00 1.4500 !

CG2R51 NG2O1 230.00 1.4020 !

CG2R61 OG302 230.00 1.3820 !

#### ANGLES

CG2R51 CG2DC1 NG2D1 56.00 117.00 !

CG2R51 CG2DC1 HGA4 32.00 120.00 !

CG2DC1 CG2R51 CG2R51 45.80 130.00 !

CG2DC1 CG2R51 OG2R50 45.80 124.00 !

CG2R51 CG2R51 NG2O1 55.00 125.50 !

NG2O1 CG2R51 OG2R50 65.00 127.80 !

CG2R61 CG2R61 OG302 110.00 120.00 !

CG2R51 NG2O1 OG2N1 65.00 116.00 !

CG2O2 OG302 CG2R61 185.00 120.00 !

#### DIHEDRALS

NG2D1 CG2DC1 CG2R51 CG2R51 1.6000 2 180.00 !

NG2D1 CG2DC1 CG2R51 OG2R50 1.6000 2 180.00 !

HGA4 CG2DC1 CG2R51 CG2R51 0.6000 2 180.00 !

HGA4 CG2DC1 CG2R51 OG2R50 0.6000 2 180.00 !

CG2R51 CG2DC1 NG2D1 NG2S1 12.0000 2 180.00 !

|        |        |        |        |         |   |          |
|--------|--------|--------|--------|---------|---|----------|
| CG321  | CG2O2  | OG302  | CG2R61 | 2.0500  | 2 | 180.00 ! |
| OG2D1  | CG2O2  | OG302  | CG2R61 | 0.9650  | 1 | 180.00 ! |
| OG2D1  | CG2O2  | OG302  | CG2R61 | 3.8500  | 2 | 180.00 ! |
| CG2DC1 | CG2R51 | CG2R51 | CG2R51 | 15.0000 | 2 | 180.00 ! |
| CG2DC1 | CG2R51 | CG2R51 | HGR51  | 1.0000  | 2 | 180.00 ! |
| CG2R51 | CG2R51 | CG2R51 | NG2O1  | 8.5000  | 2 | 180.00 ! |
| NG2O1  | CG2R51 | CG2R51 | HGR51  | 2.7000  | 2 | 180.00 ! |
| CG2R51 | CG2R51 | NG2O1  | OG2N1  | 0.9000  | 2 | 180.00 ! |
| OG2R50 | CG2R51 | NG2O1  | OG2N1  | 0.9000  | 2 | 180.00 ! |
| CG2DC1 | CG2R51 | OG2R50 | CG2R51 | 7.5000  | 2 | 180.00 ! |
| NG2O1  | CG2R51 | OG2R50 | CG2R51 | 8.5000  | 2 | 180.00 ! |
| CG2R61 | CG2R61 | CG2R61 | OG302  | 3.1000  | 2 | 180.00 ! |
| OG302  | CG2R61 | CG2R61 | HGR61  | 2.4000  | 2 | 180.00 ! |
| CG2R61 | CG2R61 | OG302  | CG2O2  | 1.2000  | 2 | 180.00 ! |

#### IMPROPERS

|        |        |       |      |         |   |        |
|--------|--------|-------|------|---------|---|--------|
| CG2DC1 | CG2R51 | NG2D1 | HGA4 | 30.0000 | 0 | 0.00 ! |
|--------|--------|-------|------|---------|---|--------|

END

**Parameter file for linkage between nifuroxazide moiety and PAzPC:**

BONDS

CG321 CTL2 222.500 1.530 ! alkanes, 3/92

ANGLES

CG321 CG321 CTL2 58.350 113.60 11.16 2.561 ! alkane, 3/92

HGA2 CG321 CTL2 26.500 110.10 22.53 2.179 ! alkane, 4/98

CG321 CTL2 CTL2 58.350 113.60 11.16 2.561 ! alkane, 3/92

CG321 CTL2 HAL2 26.500 110.10 22.53 2.179 ! alkane, 4/98

DIHEDRALS

CG2O2 CG321 CG321 CTL2 0.000 5 180.00 ! propyl ester, 6/07

CG2O2 CG321 CG321 CTL2 0.317 3 180.00 ! propyl ester, 6/07

CG2O2 CG321 CG321 CTL2 0.557 2 0.00 ! propyl ester, 6/07

CG2O2 CG321 CG321 CTL2 0.753 1 0.00 ! propyl ester, 6/07

X CG321 CG321 X 0.1900 3 0.00 ! alkane, 4/98, yin and mackerell

X CG321 CTL2 X 0.1900 3 0.00 ! alkane, 4/98, yin and mackerell

CG321 CG321 CTL2 CTL2 0.101 2 0.00 ! alkane, 7/08, jbk

CG321 CG321 CTL2 CTL2 0.142 3 180.00 ! alkane, 7/08, jbk

CG321 CG321 CTL2 CTL2 0.074 4 0.00 ! alkane, 7/08, jbk

CG321 CG321 CTL2 CTL2 0.097 5 0.00 ! alkane, 7/08, jbk

IMPROPER

OG2D1 X X CG2O2 100.00 0 0.00 ! acetic acid

OG2D1 X X CG2O1 120.0000 0 0.0000 ! ALLOW PEP POL ARO

NONBONDED nbxmod 5 atom cdiel shift vatom vdistance vswitch -  
cutnb 14.0 ctofnb 12.0 ctonnb 10.0 eps 1.0 e14fac 1.0 wmin 1.5

END

**Topology file for nifuroxazide moiety, which includes atom type, charge, bonding information:**



\* Toppar stream file generated by  
\* CHARMM General Force Field (CGenFF) program version 0.9.7.1 beta  
\* For use with CGenFF version 2b8  
\*

read rtf card append

\* Topologies generated by  
\* CHARMM General Force Field (CGenFF) program version 0.9.7.1 beta  
\*

36 1

|           |                 |
|-----------|-----------------|
| RESI NIF  | 0.000 !         |
| GROUP     | ! CHARGE        |
| ATOM C1   | CG2R61 -0.101 ! |
| ATOM H3   | HGR61 0.115 !   |
| ATOM C2   | CG2R61 0.216 !  |
| ATOM O1   | OG302 -0.454 !  |
| ATOM C4   | CG2R61 -0.101 ! |
| ATOM H4   | HGR61 0.115 !   |
| ATOM C5   | CG2R61 -0.063 ! |
| ATOM H5   | HGR61 0.115 !   |
| ATOM C6   | CG2R61 -0.071 ! |
| ATOM C7   | CG2R61 -0.063 ! |
| ATOM H6   | HGR61 0.115 !   |
| ATOM C8   | CG2O2 0.927 !   |
| ATOM C9   | CG321 -0.221 !  |
| ATOM H1   | HGA2 0.090 !    |
| ATOM H2   | HGA2 0.090 !    |
| ATOM C3   | CG321 -0.181 !  |
| ATOM C31  | CG331 -0.273 !  |
| ATOM H311 | HGA3 0.090 !    |
| ATOM H312 | HGA3 0.090 !    |
| ATOM H313 | HGA3 0.090 !    |
| ATOM H32  | HGA2 0.090 !    |

ATOM H33 HGA2 0.090 !  
ATOM O2 OG2D1 -0.644 !  
ATOM C10 CG2O1 0.458 !  
ATOM N2 NG2S1 -0.344 !  
ATOM N1 NG2D1 -0.315 !  
ATOM H9 HGP1 0.305 !  
ATOM O3 OG2D1 -0.406 !  
ATOM C11 CG2DC1 -0.279 !  
ATOM H10 HGA4 0.239 !  
ATOM C12 CG2R51 -0.273 !  
ATOM H7 HGR51 0.196 !  
ATOM C13 CG2R51 -0.273 !  
ATOM H8 HGR51 0.196 !  
ATOM C14 CG2R51 0.508 !  
ATOM O4 OG2R50 -0.342 !  
ATOM C15 CG2R51 0.511 !  
ATOM N3 NG2O1 0.408 !  
ATOM O5 OG2N1 -0.325 !  
ATOM O6 OG2N1 -0.325 !

BOND C1 H3  
BOND C1 C2  
BOND C1 C7  
BOND C2 O1  
BOND C2 C4  
BOND O1 C8  
BOND C4 H4  
BOND C4 C5  
BOND C5 H5  
BOND C5 C6  
BOND C6 C7  
BOND C6 C10  
BOND C7 H6

BOND C8 C9  
BOND C8 O2  
BOND C9 H1  
BOND C9 H2  
BOND C9 C3  
BOND C3 C31  
BOND C3 H32  
BOND C3 H33  
BOND C31 H311  
BOND C31 H312  
BOND C31 H313  
BOND C10 N2  
BOND C10 O3  
BOND N2 N1  
BOND N2 H9  
BOND N1 C11  
BOND C11 H10  
BOND C11 C14  
BOND C12 H7  
BOND C12 C13  
BOND C12 C15  
BOND C13 H8  
BOND C13 C14  
BOND C14 O4  
BOND O4 C15  
BOND C15 N3  
BOND N3 O5  
BOND N3 O6  
IMPR C8 C9 O2 O1  
IMPR C10 C6 N2 O3  
IMPR C11 C14 N1 H10

END

## References:

- (1) Shillcock, J. C.; Lipowsky, R. Equilibrium Structure and lateral stress distribution of amphiphilic bilayers from dissipative particle dynamics simulations. *J. Chem. Phys.* 2002, 117, 5048.
- (2) Groot, R. D.; Rabone, K. L. Mesoscopic Simulation of Cell Membrane Damage, Morphology Change and Rupture by Nonionic Surfactants. *Biophys. J.* **2001**, 81, 725.
- (3) Yamamoto, S.; Maruyama, Y.; Hyodo, S. Coarse Gaining and Scaling in Dissipative Particle Dynamics. *J. Chem. Phys.* **2002**, 116, 5842.
- (4) Ortiz, V.; Nielsen, S. O.; Discher, D. E.; Klein, M. L.; Lipowsky, R.; Shillcock, J. Dissipative particle dynamics simulations of polymersomes. *J. Phys. Chem. B* **2005**, 109, 17708.
- (5) Kranenburg, M.; Nicolas, J.; Smit, B. Comparison of Mesoscopic Phospholipid–water Models. *Phys. Chem. Chem. Phys.* **2004**, 6, 4142.
- (6) Plimpton, S. Fast Parallel Algorithms for Short-Range Molecular Dynamics. *J. Comp. Phys.* **1995**, 117, 1.
- (7) Phillips, J. C.; Braun, R.; Wang, W.; Gumbart, J.; Tajkhorshid, E.; Villa, E.; Chipot, C.; Skeel, R. D.; Kalé, L.; Schulten, K. Scalable Molecular Dynamics with NAMD. *J. Comput. Chem.* 2005, 26, 1781.
- (8) Vanommeslaeghe, K.; Hatcher, E.; Acharya, C.; Kundu, S.; Zhong, S.; Shim, J.; Darian, E.; Guvench, O.; Lopes, P.; Vorobyov, I.; Mackerell, A. D., Jr. CHARMM General Force Field: A Force Field for Drug-Like Molecules Compatible with the CHARMM All-Atom Additive Biological Force Fields. *J. Comput. Chem.* **2010**, 31, 671–690.
- (9) Klauda, J. B.; Venable, R. M.; Freites, J. A.; O'Connor, J. W.; Tobias, D. J.; Mondragon-Ramirez, C.; Vorobyov, I.; MacKerell, A. D., Jr.; Pastor, R. W. Update of the CHARMM All-Atom Additive Force Field for Lipids: Validation on Six Lipid Types. *J. Phys. Chem. B* **2010**, 114, 7830–7843.
- (10) MacKerell, A. D., Jr.; Bashford, D.; Bellott, M.; Dunbrack, R. L., Jr.; Evanseck, J. D.; Field, M. J.; Fischer, S.; Gao, J.; Guo, H.; Ha, S.; Joseph-McCarthy, D.; Kuchnir, L.; Kuczera, K.; Lau, F. T. K.; Mattos, C.; Michnick, S.; Ngo, T.; Nguyen, D. T.; Prodhom, B.; Reiher, W. E.; Roux, B.;

- Schlenkrich, M.; Smith, J. C.; Stote, R.; Straub, J.; Watanabe, M.; Wiórkiewicz-Kuczera, J.; Yin, D.; Karplus, M. All-Atom Empirical Potential for Molecular Modeling and Dynamics Studies of Proteins. *J. Phys. Chem. B* **1998**, 102, 3586–3616.
- (11) Darden, T.; York, D.; Pedersen, L. G. Particle Mesh Ewald: An  $N^3\log(N)$  Method for Ewald Sums in Large systems. *J. Chem. Phys.* **1993**, 98, 10089–10092.
- (12) Tuckerman, M.; Berne, B. J.; Martyna, G. J. Reversible Multiple Time Scale Molecular Dynamics. *J. Chem. Phys.* **1992**, 97, 1990–2001.
- (13) Miyamoto, S.; Kollman, P. A. Settle: An Analytical Version of the SHAKE and RATTLE Algorithm for Rigid Water Models. *J. Comput. Chem.* **1992**, 13, 952–962.
- (14) Andersen, H. C. Rattle: A “Velocity” Version of the Shake Algorithm for Molecular Dynamics Calculations. *J. Comput. Phys.* **1983**, 52, 24–34.
- (15) Grossfield, A. WHAM: The Weighted Histogram Analysis Method, version 2.0.9, <http://membrane.urmc.rochester.edu/content/wham>.
